# Supplementary material
Source: PubMed Central journal article supplement (PMC7940594)
Supplement: NIHMS1672034-supplement-1672034_SuppMaterial.pdf [file NIHMS1672034-supplement-1672034_SuppMaterial.pdf]

ESM Table 1 – The risk of islet autoimmunity (IA) and type 1 diabetes associated with weight and length/height z-scores by age and time-varying model of growth up to 10 years of age in children having first-degree relative/s with type 1 diabetes and increased HLA-conferred risk of type 1 diabetes (N=2,149)

| Age, years                             | Any IA <sup>a</sup><br>(n=305) |           |         | IAA First Antibody<br>(n=183) |           |         | GADA First Antibody<br>(n=189) |           |         | Multiple IA*<br>(n=190) |           |         |
|----------------------------------------|--------------------------------|-----------|---------|-------------------------------|-----------|---------|--------------------------------|-----------|---------|-------------------------|-----------|---------|
|                                        | HR                             | 95% CI    | P value | HR                            | 95% CI    | P value | HR                             | 95% CI    | P value | HR                      | 95% CI    | P value |
| Weight z score                         |                                |           |         |                               |           |         |                                |           |         |                         |           |         |
| 1                                      | 1.12                           | 0.99-1.26 | 0.07    | 1.10                          | 0.94-1.28 | 0.25    | 0.97                           | 0.84-1.13 | 0.74    | 1.11                    | 0.95-1.30 | 0.18    |
| 2                                      | 1.05                           | 0.93-1.19 | 0.42    | 1.08                          | 0.93-1.27 | 0.32    | 1.00                           | 0.86-1.16 | 0.98    | 1.14                    | 0.97-1.34 | 0.11    |
| 3                                      | 1.05                           | 0.92-1.20 | 0.48    | 1.11                          | 0.94-1.31 | 0.24    | 0.98                           | 0.83-1.14 | 0.76    | 1.16                    | 0.97-1.39 | 0.09    |
| 4                                      | 1.07                           | 0.92-1.23 | 0.39    | 1.05                          | 0.88-1.25 | 0.59    | 0.98                           | 0.83-1.16 | 0.80    | 1.16                    | 0.96-1.41 | 0.12    |
| 5                                      | 1.06                           | 0.91-1.23 | 0.45    | 1.02                          | 0.85-1.22 | 0.87    | 1.02                           | 0.87-1.20 | 0.79    | 1.21                    | 0.99-1.48 | 0.06    |
| 6                                      | 1.07                           | 0.93-1.23 | 0.37    | 1.01                          | 0.85-1.20 | 0.95    | 1.06                           | 0.90-1.24 | 0.50    | 1.24                    | 1.02-1.51 | 0.03    |
| 7                                      | 1.05                           | 0.91-1.21 | 0.52    | 1.02                          | 0.85-1.21 | 0.86    | 0.98                           | 0.84-1.15 | 0.80    | 1.17                    | 0.96-1.43 | 0.13    |
| 8                                      | 1.03                           | 0.89-1.20 | 0.64    | 1.03                          | 0.87-1.23 | 0.73    | 1.05                           | 0.90-1.24 | 0.53    | 1.07                    | 0.87-1.31 | 0.53    |
| 9                                      | 1.03                           | 0.88-1.20 | 0.71    | 1.03                          | 0.86-1.24 | 0.75    | 1.03                           | 0.87-1.22 | 0.73    | 1.14                    | 0.91-1.43 | 0.26    |
| 10                                     | 0.96                           | 0.82-1.13 | 0.62    | 1.07                          | 0.89-1.28 | 0.48    | 0.99                           | 0.84-1.17 | 0.93    | 0.98                    | 0.76-1.26 | 0.87    |
| Length/height z score                  |                                |           |         |                               |           |         |                                |           |         |                         |           |         |
| 1                                      | 1.08                           | 0.95-1.23 | 0.25    | 1.10                          | 0.93-1.31 | 0.26    | 0.98                           | 0.83-1.16 | 0.86    | 1.08                    | 0.91-1.27 | 0.40    |
| 2                                      | 1.03                           | 0.90-1.18 | 0.66    | 0.95                          | 0.80-1.13 | 0.55    | 1.01                           | 0.86-1.19 | 0.88    | 1.16                    | 0.97-1.38 | 0.10    |
| 3                                      | 1.08                           | 0.94-1.24 | 0.29    | 1.03                          | 0.87-1.22 | 0.75    | 1.00                           | 0.85-1.18 | 1.00    | 1.21                    | 1.01-1.45 | 0.04    |
| 4                                      | 1.03                           | 0.89-1.18 | 0.72    | 1.01                          | 0.84-1.20 | 0.95    | 1.00                           | 0.85-1.18 | 0.99    | 1.08                    | 0.90-1.30 | 0.42    |
| 5                                      | 1.05                           | 0.91-1.21 | 0.54    | 1.02                          | 0.85-1.22 | 0.81    | 1.02                           | 0.87-1.20 | 0.82    | 1.14                    | 0.94-1.39 | 0.18    |
| 6                                      | 0.96                           | 0.84-1.10 | 0.56    | 0.96                          | 0.81-1.14 | 0.63    | 1.00                           | 0.85-1.17 | 0.97    | 1.01                    | 0.83-1.22 | 0.91    |
| 7                                      | 0.96                           | 0.83-1.11 | 0.58    | 0.94                          | 0.78-1.13 | 0.52    | 0.96                           | 0.81-1.13 | 0.60    | 1.03                    | 0.84-1.26 | 0.79    |
| 8                                      | 1.00                           | 0.87-1.16 | 0.96    | 1.00                          | 0.84-1.20 | 0.98    | 1.00                           | 0.85-1.19 | 0.96    | 1.04                    | 0.85-1.28 | 0.71    |
| 9                                      | 1.00                           | 0.86-1.17 | 0.96    | 1.01                          | 0.83-1.22 | 0.93    | 0.97                           | 0.81-1.15 | 0.69    | 1.04                    | 0.83-1.30 | 0.75    |
| 10                                     | 0.96                           | 0.82-1.14 | 0.67    | 1.06                          | 0.88-1.29 | 0.53    | 0.95                           | 0.80-1.13 | 0.59    | 0.93                    | 0.72-1.20 | 0.58    |
| Weight z score up to 10 years          | 1.10                           | 0.97-1.25 | 0.13    | 1.10                          | 0.93-1.29 | 0.28    | 1.02                           | 0.87-1.19 | 0.80    | 1.19                    | 1.02-1.39 | 0.03    |
| Length/height z score up to 10 years   | 1.08                           | 0.95-1.22 | 0.27    | 0.93                          | 0.78-1.11 | 0.42    | 0.98                           | 0.84-1.16 | 0.85    | 1.22                    | 1.03-1.43 | 0.02    |
| Weight z score (joint modeling)        | 1.06                           | 0.91-1.23 | 0.43    | 1.01                          | 0.83-1.22 | 0.96    | 0.98                           | 0.81-1.17 | 0.79    | 1.16                    | 0.96-1.40 | 0.13    |
| Length/height z score (joint modeling) | 1.09                           | 0.93-1.27 | 0.29    | 1.01                          | 0.83-1.23 | 0.93    | 1.02                           | 0.84-1.24 | 0.82    | 1.19                    | 0.98-1.45 | 0.08    |

<sup>a</sup>Antibodies include insulin autoantibodies (IAA), islet antigen-2, GAD (GADA), and zinc transporter 8 autoantibodies.

HRs adjusted for birth weight z score (for weight z-score models) and birth length z-score (for length/height z-score models), sex, HLA risk, maternal type 1 diabetes status, mode of delivery, and breastfeeding duration and stratified by region of residence. Presented p-values are nominal (uncorrected) p-values, and were considered significant if < 0.005.

ESM Table 2 – The risk of islet autoimmunity (IA) associated with overweight (includes obese) and obesity by age and time-varying model of overweight (includes obese) and obesity and up to 10 years of age using International Obesity Task Force BMI cut-off points (N=2,149)

| Age, years                  | Any IA <sup>a</sup><br>(n=305) |           |         | IAA First Antibody<br>(n=183) |           |         | GADA First Antibody<br>(n=189) |           |         | Multiple IA *<br>(n=190) |           |         |
|-----------------------------|--------------------------------|-----------|---------|-------------------------------|-----------|---------|--------------------------------|-----------|---------|--------------------------|-----------|---------|
|                             | HR                             | 95% CI    | P value | HR                            | 95% CI    | P value | HR                             | 95% CI    | P value | HR                       | 95% CI    | P value |
| Overweight (%)              |                                |           |         |                               |           |         |                                |           |         |                          |           |         |
| 2                           | 0.92                           | 0.59-1.44 | 0.73    | 0.90                          | 0.51-1.60 | 0.73    | 0.90                           | 0.53-1.53 | 0.69    | 0.93                     | 0.52-1.65 | 0.80    |
| 3                           | 0.84                           | 0.56-1.25 | 0.39    | 1.00                          | 0.62-1.61 | 0.99    | 1.04                           | 0.66-1.63 | 0.86    | 0.76                     | 0.44-1.31 | 0.32    |
| 4                           | 1.22                           | 0.86-1.73 | 0.27    | 0.96                          | 0.59-1.55 | 0.85    | 1.11                           | 0.72-1.70 | 0.64    | 1.28                     | 0.81-2.03 | 0.30    |
| 5                           | 1.02                           | 0.71-1.47 | 0.90    | 1.03                          | 0.65-1.62 | 0.90    | 1.16                           | 0.79-1.72 | 0.44    | 1.45                     | 0.92-2.28 | 0.11    |
| 6                           | 1.15                           | 0.80-1.64 | 0.45    | 1.12                          | 0.72-1.74 | 0.62    | 1.12                           | 0.76-1.67 | 0.56    | 1.54                     | 0.96-2.45 | 0.07    |
| 7                           | 1.01                           | 0.72-1.43 | 0.95    | 1.12                          | 0.74-1.70 | 0.60    | 1.00                           | 0.68-1.45 | 0.98    | 1.31                     | 0.83-2.06 | 0.25    |
| 8                           | 0.94                           | 0.66-1.32 | 0.71    | 1.23                          | 0.83-1.82 | 0.31    | 1.01                           | 0.69-1.47 | 0.96    | 1.13                     | 0.71-1.79 | 0.62    |
| 9                           | 0.92                           | 0.65-1.31 | 0.64    | 1.37                          | 0.93-2.02 | 0.11    | 0.90                           | 0.61-1.32 | 0.59    | 1.11                     | 0.67-1.82 | 0.68    |
| 10                          | 0.75                           | 0.51-1.11 | 0.15    | 1.12                          | 0.74-1.70 | 0.60    | 0.98                           | 0.67-1.44 | 0.93    | 0.85                     | 0.47-1.53 | 0.59    |
| Obesity (%)                 |                                |           |         |                               |           |         |                                |           |         |                          |           |         |
| 2                           | 1.24                           | 0.50-3.03 | 0.64    | 0.89                          | 0.22-3.61 | 0.87    | 1.45                           | 0.53-3.95 | 0.47    | 1.67                     | 0.61-4.61 | 0.32    |
| 3                           | 0.97                           | 0.40-2.36 | 0.94    | 1.64                          | 0.67-4.04 | 0.28    | 1.37                           | 0.56-3.37 | 0.49    | 1.01                     | 0.32-3.20 | 0.99    |
| 4                           | 1.68                           | 0.88-3.21 | 0.12    | 1.76                          | 0.81-3.81 | 0.15    | 1.16                           | 0.51-2.65 | 0.72    | 2.18                     | 1.00-4.76 | 0.05    |
| 5                           | 1.20                           | 0.66-2.18 | 0.55    | 0.94                          | 0.41-2.15 | 0.88    | 0.90                           | 0.43-1.85 | 0.77    | 1.56                     | 0.75-3.26 | 0.24    |
| 6                           | 1.27                           | 0.74-2.18 | 0.38    | 0.96                          | 0.47-1.99 | 0.92    | 1.05                           | 0.56-1.95 | 0.89    | 1.58                     | 0.78-3.17 | 0.20    |
| 7                           | 1.33                           | 0.80-2.22 | 0.27    | 1.42                          | 0.77-2.63 | 0.26    | 1.15                           | 0.66-2.02 | 0.62    | 1.25                     | 0.60-2.63 | 0.55    |
| 8                           | 1.20                           | 0.73-1.97 | 0.48    | 1.67                          | 0.97-2.88 | 0.06    | 1.31                           | 0.78-2.21 | 0.31    | 1.38                     | 0.71-2.70 | 0.35    |
| 9                           | 1.26                           | 0.75-2.12 | 0.38    | 1.26                          | 0.68-2.34 | 0.46    | 1.11                           | 0.63-1.97 | 0.71    | 1.35                     | 0.64-2.87 | 0.43    |
| 10                          | 0.99                           | 0.55-1.78 | 0.98    | 1.37                          | 0.75-2.50 | 0.30    | 1.11                           | 0.63-1.97 | 0.71    | 0.96                     | 0.38-2.46 | 0.94    |
| Overweight up to 10 years   | 0.99                           | 0.65-1.49 | 0.94    | 1.08                          | 0.62-1.88 | 0.80    | 0.76                           | 0.46-1.26 | 0.28    | 1.21                     | 0.74-1.98 | 0.45    |
| Obesity up to 10 years      | 0.67                           | 0.27-1.64 | 0.38    | 1.28                          | 0.51-3.21 | 0.60    | 0.55                           | 0.20-1.52 | 0.25    | 1.96                     | 0.94-4.12 | 0.07    |
| Overweight (joint modeling) | 0.68                           | 0.41-1.12 | 0.13    | 0.63                          | 0.32-1.22 | 0.17    | 0.81                           | 0.45-1.44 | 0.47    | 1.15                     | 0.63-2.10 | 0.65    |
| Obesity (joint modeling)    |                                |           |         |                               |           |         |                                |           |         |                          |           |         |

<sup>a</sup>Antibodies include insulin autoantibodies (IAA), islet antigen-2, GAD (GADA), and zinc transporter 8 autoantibodies.

BMI – body mass index.

HRs adjusted for birth weight z score and birth length z score, sex, HLA risk, maternal type 1 diabetes status, mode of delivery, and breastfeeding duration and stratified by region of residence. Presented p-values are nominal (uncorrected) p-values, and were considered significant if < 0.005. Shaded analyses: model failed to converge.

ESM Table 3 – The risk of type 1 diabetes associated with weight and length/height z-scores by age and time-varying model of growth up to 10 years of age in children having first-degree relative/s with type 1 diabetes and increased HLA-conferred risk of type 1 diabetes (N=2,149)

| Age, years                             | From multiple IA <sup>a</sup> to Type 1 Diabetes (n=133) |           |         | Type 1 Diabetes (n=172) |           |         |
|----------------------------------------|----------------------------------------------------------|-----------|---------|-------------------------|-----------|---------|
|                                        | HR                                                       | 95% CI    | P value | HR                      | 95% CI    | P value |
| Weight (z score)                       |                                                          |           |         |                         |           |         |
| 1                                      | 1.22                                                     | 0.97-1.53 | 0.09    | 1.22                    | 1.03-1.44 | 0.02    |
| 2                                      | 1.34                                                     | 1.06-1.68 | 0.01    | 1.25                    | 1.05-1.49 | 0.01    |
| 3                                      | 1.48                                                     | 1.13-1.92 | 0.004   | 1.27                    | 1.04-1.55 | 0.02    |
| 4                                      | 1.33                                                     | 1.00-1.77 | 0.05    | 1.20                    | 0.96-1.51 | 0.11    |
| 5                                      | 1.35                                                     | 0.99-1.83 | 0.06    | 1.23                    | 0.96-1.57 | 0.10    |
| 6                                      | 1.57                                                     | 1.12-2.19 | 0.009   | 1.31                    | 1.02-1.69 | 0.03    |
| 7                                      | 1.51                                                     | 1.08-2.10 | 0.02    | 1.16                    | 0.89-1.51 | 0.27    |
| 8                                      | 1.42                                                     | 1.01-1.99 | 0.04    | 1.23                    | 0.93-1.62 | 0.15    |
| 9                                      | 1.79                                                     | 1.10-2.90 | 0.02    | 1.36                    | 0.97-1.90 | 0.07    |
| 10                                     | 3.69                                                     | 1.40-9.69 | 0.008   | 1.15                    | 0.76-1.73 | 0.52    |
| Length/height z score                  |                                                          |           |         |                         |           |         |
| 1                                      | 1.03                                                     | 0.83-1.28 | 0.79    | 1.03                    | 0.86-1.23 | 0.78    |
| 2                                      | 1.10                                                     | 0.85-1.42 | 0.48    | 1.19                    | 0.99-1.44 | 0.06    |
| 3                                      | 1.10                                                     | 0.86-1.41 | 0.46    | 1.15                    | 0.94-1.41 | 0.17    |
| 4                                      | 1.04                                                     | 0.81-1.35 | 0.75    | 1.02                    | 0.82-1.27 | 0.84    |
| 5                                      | 0.96                                                     | 0.72-1.29 | 0.80    | 1.07                    | 0.84-1.36 | 0.58    |
| 6                                      | 0.92                                                     | 0.69-1.25 | 0.61    | 0.96                    | 0.75-1.23 | 0.73    |
| 7                                      | 1.11                                                     | 0.81-1.54 | 0.51    | 1.01                    | 0.77-1.33 | 0.94    |
| 8                                      | 1.04                                                     | 0.72-1.51 | 0.82    | 1.10                    | 0.82-1.46 | 0.52    |
| 9                                      | 1.38                                                     | 0.82-2.32 | 0.22    | 1.06                    | 0.75-1.48 | 0.74    |
| 10                                     | 1.04                                                     | 0.47-2.26 | 0.93    | 0.79                    | 0.51-1.21 | 0.28    |
| Weight z-score up to 10 years          | 1.28                                                     | 1.03-1.60 | 0.03    | 1.30                    | 1.06-1.60 | 0.01    |
| Length/height z score up to 10 years   | 1.08                                                     | 0.86-1.35 | 0.51    | 1.27                    | 1.03-1.58 | 0.03    |
| Weight z score (joint modeling)        | 1.53                                                     | 1.16-2.03 | 0.003   | 1.43                    | 1.20-1.72 | <0.001  |
| Length/height z score (joint modeling) | 1.32                                                     | 0.98-1.78 | 0.07    | 1.20                    | 0.98-1.45 | 0.07    |

<sup>a</sup>Antibodies include insulin autoantibodies, islet antigen-2, GAD, and zinc transporter 8 autoantibodies; the number of children with multiple IA = 190.

IA – islet autoimmunity.

HRs adjusted for birth weight z score and birth length z score, sex, HLA risk, maternal type 1 diabetes status, mode of delivery, and breastfeeding duration and stratified by region of residence. Presented p-values are nominal (uncorrected) p-values, and were considered significant if < 0.005.

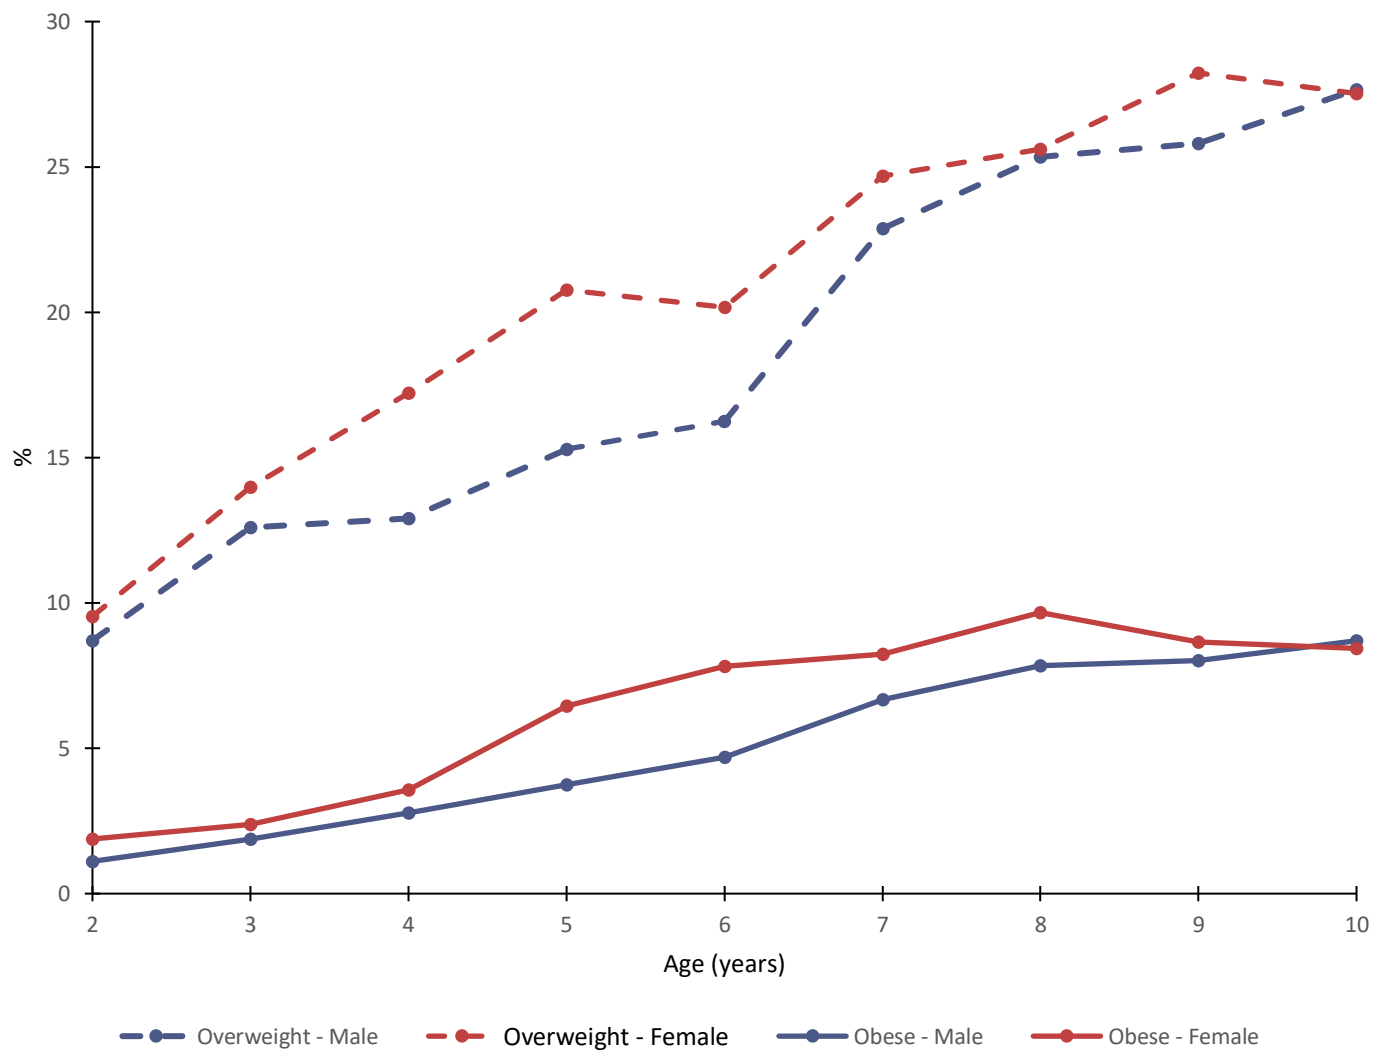

ESM Fig 1 – Proportion (%) of overweight (including obese) and obese children aged 2 to 10 years

## LIST OF TRIGR INVESTIGATORS

| <u>Administration/<br/>Country</u>                                | <u>Study center</u> | <u>Last name</u>     | <u>First name</u> | <u>Position</u>                                                                 |
|-------------------------------------------------------------------|---------------------|----------------------|-------------------|---------------------------------------------------------------------------------|
| <b>Data Safety Monitoring Board</b>                               |                     | Mandrup-Poulsen      | Thomas            | Chair, University of Copenhagen, Copenhagen, Denmark                            |
|                                                                   |                     | Arjas                | Elias             | Member, University of Helsinki, Helsinki, Finland                               |
|                                                                   |                     | Läärä                | Esa               | Member, University of Oulu, Oulu, Finland                                       |
|                                                                   |                     | Lernmark             | Åke               | Member, University of Lund, Malmö, Sweden                                       |
|                                                                   |                     | Schmidt              | Barbara           | Member, University of Pennsylvania, Philadelphia, PA, USA                       |
|                                                                   |                     | Krischer             | Jeffrey P.        | Observer, University of South Florida, Tampa, FL, USA                           |
| <b>International Coordinating Center (ICC), Helsinki, Finland</b> |                     | Åkerblom             | Hans K.           | PI of the Study until 30.6.08, Deputy PI from 1.7.2008                          |
|                                                                   |                     | Hyytinen             | Mila              | European Study Monitor                                                          |
|                                                                   |                     | Knip                 | Mikael            | Deputy PI until 30.6.2008, PI of the Study from 1.7.2008, National Investigator |
|                                                                   |                     | Koski                | Katriina          | European Study Monitor                                                          |
|                                                                   |                     | Koski                | Matti             | IT Specialist                                                                   |
|                                                                   |                     | Pajakkala<br>Salonen | Eeva<br>Marja     | European Study Monitor<br>Study Coordinator                                     |
| <b>Data Management Unit (DMU), Tampa, FL, USA</b>                 |                     | Cuthbertson          | David             | Biostatistician                                                                 |
|                                                                   |                     | Krischer             | Jeffrey P.        | PI of the DMU                                                                   |
|                                                                   |                     | Shanker              | Linda             | Coordinator                                                                     |

**Canadian Coordinating  
Center, London and Ottawa,  
ON**

Bradley  
Dosch

Brenda  
Hans-Michael

National Coordinator  
Co-Investigator for  
Canada

Dupré

John

Co-PI for North America  
and National Investigator  
until 08/12/2015,  
Executive Committee

Fraser

William

Co-Investigator for  
Canada

Lawson

Margaret

Executive Committee  
Co-Investigator for  
Canada

Mahon

Jeffrey L.

Executive Committee  
Co-PI for North America  
and National Investigator  
after 08/12/2015,  
Executive Committee

Sermer

Mathew

Co-Investigator for  
Canada,  
Executive Committee

Taback

Shayne P.

Co-Investigator for  
Canada,  
Executive Committee

**USA Coordinating Center,  
Pittsburgh, PA and Seattle,  
WA**

Becker

Dorothy

Co-PI for North America,  
National Investigator,  
Executive Committee

Franciscus  
Nucci

Margaret  
Anita

National Coordinator  
National Coordinator,  
Nutrition Coordinator of  
North America

Palmer

Jerry

Executive Committee

**Nutritional Epidemiology  
Unit, Helsinki, Finland**

Virtanen

Suvi M.

Head of Nutritional  
Epidemiology Unit

|                                                                        |                                                                                        |                                                      |                                                      |                                                                         |
|------------------------------------------------------------------------|----------------------------------------------------------------------------------------|------------------------------------------------------|------------------------------------------------------|-------------------------------------------------------------------------|
| <b>Australia</b>                                                       | <b>AUS01 - Westmead - Children's Hospital</b>                                          | Catteau<br>Howard                                    | Jacki<br>Neville                                     | National Coordinator<br>National Investigator                           |
|                                                                        | <b>AUS02 - Newcastle - John Hunter Children's Hospital</b>                             | Crock                                                | Patricia                                             | Local Investigator                                                      |
|                                                                        | <b>AUS03 - Sydney - Sydney Children's Hospital</b>                                     | Craig                                                | Maria                                                | Local Investigator                                                      |
| <b>Canada</b>                                                          | <b>CAN01 - London - St. Joseph's Health Care Centre</b>                                | Clarson<br>Bere                                      | Cheril L.<br>Lynda                                   | Local Investigator<br>Coordinator                                       |
|                                                                        | <b>CAN02 - Vancouver - Children's and Women's Health Centre of British Columbia</b>    | Thompson<br>Metzger<br>Marshall                      | David<br>Daniel<br>Colleen                           | Local Investigator<br>Local Investigator<br>Coordinator (In Transition) |
|                                                                        |                                                                                        | Kwan                                                 | Jennifer                                             | Coordinator (In Transition)                                             |
|                                                                        |                                                                                        | <b>CAN03 - Calgary - Alberta Children's Hospital</b> | Stephure<br>Pacaud<br>Schwarz                        | David K.<br>Daniele<br>Wendy                                            |
|                                                                        | <b>CAN04 - Edmonton - Walter MacKenzie Health Sciences</b>                             | Girgis<br>Thompson                                   | Rose<br>Marilyn                                      | Local Investigator<br>Coordinator                                       |
|                                                                        | <b>CAN05 - Winnipeg - Health Sciences Centre</b>                                       | Taback<br>Catte                                      | Shayne P<br>Daniel                                   | Local Investigator<br>Coordinator                                       |
|                                                                        | <b>CAN06 - Ottawa - Children's Hospital of Eastern Ontario and The Ottawa Hospital</b> | Lawson<br>Bradley                                    | Margaret L<br>Brenda                                 | Local Investigator<br>Coordinator                                       |
| <b>CAN07 - Toronto Mount Sinai Hospital/Hospital for Sick Children</b> | Daneman<br>Sermer<br>Martin                                                            | Denis<br>Mathew<br>Mary-Jean                         | Local Investigator<br>Co-Investigator<br>Coordinator |                                                                         |

|                                                                                     |                               |                             |                                                      |
|-------------------------------------------------------------------------------------|-------------------------------|-----------------------------|------------------------------------------------------|
| <b>CAN08 - Quebec - CHUQ</b>                                                        | Morin<br>Frenette<br>Ferland  | Valérie<br>Line<br>Suzanne  | Local Investigator<br>Co-Investigator<br>Coordinator |
| <b>CAN09 - Saint John –<br/>Regional Hospital</b>                                   | Sanderson<br>Heath            | Susan<br>Kathy              | Local Investigator<br>Coordinator                    |
| <b>CAN10 - Montreal - L'<br/>Hôpital Sainte-Justine</b>                             | Huot<br>Gonthier<br>Thibeault | Céline<br>Monique<br>Maryse | Local Investigator<br>Co-Investigator<br>Coordinator |
| <b>CAN11 - Montreal<br/>Children's Hospital</b>                                     | Legault<br>Laforte            | Laurent<br>Diane            | Local Investigator<br>Coordinator                    |
| <b>CAN12 - Halifax - IWK<br/>Health Centre/Dalhousie</b>                            | Cummings<br>Scott             | Elizabeth A<br>Karen        | Local Investigator<br>Coordinator                    |
| <b>CAN13 - St. John's -<br/>Janeway Child Health<br/>Center</b>                     | Bridger<br>Crummell           | Tracey<br>Cheryl            | Local Investigator<br>Coordinator                    |
| <b>CAN14 - Kingston -<br/>Kingston General<br/>Hospital/ Queen's<br/>University</b> | Houlden<br>Breen              | Robyn<br>Adriana            | Local Investigator<br>Coordinator                    |
| <b>CAN15 - Regina - Regina<br/>Qu'Appelle</b>                                       | Carson<br>Kelly               | George<br>Sheila            | Local Investigator<br>Coordinator                    |
| <b>CAN16 - Saskatoon - Royal<br/>University Hospital</b>                            | Sankaran<br>Penner            | Koravangattu<br>Marie       | Local Investigator<br>Coordinator                    |
| <b>CAN17 - Peterborough -<br/>Peterborough Regional<br/>Health Centre</b>           | White<br>King                 | Richard A<br>Nancy          | Local Investigator<br>Coordinator                    |
| <b>CAN18 - Victoria -<br/>Vancouver Island Health<br/>Research Centre</b>           | Popkin<br>Robson              | James<br>Laurie             | Local Investigator<br>Coordinator                    |



|                                                             |                                                                       |                                   |                          |                                                                    |
|-------------------------------------------------------------|-----------------------------------------------------------------------|-----------------------------------|--------------------------|--------------------------------------------------------------------|
| <b>Czech Republic</b>                                       | <b>CZE01 - Prague - Faculty Hospital Kralovske Vinohrady</b>          | Al Taji                           | Eva                      | National Investigator/Coordinator                                  |
|                                                             |                                                                       | Mendlova                          | Pavla                    | National Coordinator                                               |
|                                                             |                                                                       | Romanova                          | Martina                  | Co-Investigator                                                    |
|                                                             |                                                                       | Vavrinec                          | Jan                      | National Investigator                                              |
|                                                             | Vosahlo                                                               | Jan                               | Co-Investigator          |                                                                    |
|                                                             | <b>CZE02 - Brno - Hospital Milosrdnych Bratri</b>                     | Brazdova                          | Ludmila                  | Local Investigator                                                 |
|                                                             | <b>CZE03- Olomouc - Faculty Hospital Olomouc</b>                      | Venhacova<br>Venhacova            | Jitrenka<br>Petra        | Local Investigator<br>Co-Investigator                              |
| <b>CZE04 - Usti nad Labem - Hospital of Masryk</b>          | Cipra                                                                 | Adam                              | Local Investigator       |                                                                    |
| <b>CZE05 - Ceske Budejovice - Hospital Ceske Budejovice</b> | Tomsikova                                                             | Zdenka                            | Local Investigator       |                                                                    |
| <b>CZE06 - Plzen - Faculty Hospital Plzen</b>               | Paterová                                                              | Petra                             | Local Investigator       |                                                                    |
| <b>CZE07 - Zlin - Hospital of Bata</b>                      | Gogelova                                                              | Pavla                             | Local Investigator       |                                                                    |
| <b>Estonia</b>                                              | <b>EST01 - Tallinn - Tallinn Children's Hospital</b>                  | Einberg                           | Ülle                     | Co-Investigator                                                    |
|                                                             |                                                                       | Riikjärv                          | Mall-Anne                | Local Investigator                                                 |
|                                                             | <b>EST02 - Tartu - Tartu University Children's Hospital</b>           | Ormisson<br>Tillmann              | Anne<br>Vallo            | National Investigator<br>Co-Investigator                           |
| <b>Finland</b>                                              | <b>FIN01 - Helsinki – Children's Hospital, University of Helsinki</b> | Johansson<br>Kleemola<br>Parkkola | Susanne<br>Päivi<br>Anna | National Coordinator<br>National Coordinator<br>Local Investigator |

|                                                                                                       |                                 |                       |                                                             |
|-------------------------------------------------------------------------------------------------------|---------------------------------|-----------------------|-------------------------------------------------------------|
| <b>FIN02 - Helsinki -<br/>Department of Obstetrics<br/>and Gynecology,<br/>University of Helsinki</b> | Järvenpää                       | Anna-Liisa            | Local Investigator                                          |
| <b>FIN03 - Espoo - Jorvi<br/>Hospital</b>                                                             | Hämäläinen<br>Kiiveri           | Anu-Maaria<br>Sanne   | Local Investigator<br>Local Investigator                    |
| <b>FIN04 - Kotka -<br/>Kymenlaakso Central<br/>Hospital</b>                                           | Salonen<br>Tenhola              | Maria<br>Sirpa        | Local Investigator<br>Local Investigator                    |
| <b>FIN05 - Lahti - Paijat-<br/>Hame Central Hospital</b>                                              | Salonen                         | Pia                   | Local Investigator                                          |
| <b>FIN06 - Tampere -<br/>Department of Pediatrics,<br/>Tampere University<br/>Hospital</b>            | Jason<br>Selvenius<br>Siljander | Eeva<br>Jenni<br>Heli | Local Investigator<br>Local Investigator<br>Co-Investigator |
| <b>FIN07 - Pori - Satakunta<br/>Central Hospital</b>                                                  | Ylitalo                         | Samuli                | Local Investigator                                          |
| <b>FIN08 - Jyväskylä - Central<br/>Finland Central Hospital</b>                                       | Paajanen                        | Ilkka                 | Local Investigator                                          |
| <b>FIN09 - Seinäjoki - South<br/>Ostrobotnia Central<br/>Hospital</b>                                 | Talvitie                        | Timo                  | Local Investigator                                          |
| <b>FIN10 - Hyvinkää -<br/>Hyvinkää Hospital</b>                                                       | Lindström                       | Kaija                 | Local Investigator                                          |
| <b>FIN11 - Kuopio -<br/>Department of Pediatrics,<br/>Kuopio University<br/>Hospital</b>              | Huopio<br>Pesola                | Hanna<br>Jouni        | Local investigator<br>Co-Investigator                       |
|                                                                                                       | Veijola                         | Riitta                | Local Investigator                                          |

|                        |                                                                          |                                   |                                   |                                                                  |
|------------------------|--------------------------------------------------------------------------|-----------------------------------|-----------------------------------|------------------------------------------------------------------|
|                        | <b>FIN12 - Oulu - Department of Pediatrics, Oulu University Hospital</b> | Tapanainen                        | Päivi                             | Co-Investigator                                                  |
|                        | <b>FIN13 - Hämeenlinna - Kanta-Häme Central Hospital</b>                 | Alar                              | Abram                             | Local Investigator                                               |
|                        | <b>FIN14 - Vaasa - Vaasa Central Hospital</b>                            | Popov                             | Erik                              | Local Investigator                                               |
|                        | <b>FIN15 - Lappeenranta - South Carelian Central Hospital</b>            | Virransalo                        | Ritva                             | Local Investigator                                               |
|                        | <b>FIN16 - Mikkeli - Mikkeli Central Hospital</b>                        | Nykänen                           | Päivi                             | Local Investigator                                               |
| <b>Germany</b>         | <b>GER01 - Hannover - Kinder- und Jugendkrankenhaus – Auf der Bult</b>   | Aschemeier<br>Danne<br>Kordonouri | Bärbel<br>Thomas<br>Olga          | National Coordinator<br>National Investigator<br>Co-Investigator |
| <b>Hungary</b>         | <b>HUN01 - Budapest - Semmelweis Medical University</b>                  | Krikovszky<br>Madácsy             | Dóra<br>László                    | Co-Investigator<br>National Investigator                         |
| <b>Italy</b>           | <b>ITA01 - Rome - University Campus Bio-Medico of Rome</b>               | Khazrai<br>Maddaloni<br>Pozzilli  | Yeganeh Manon<br>Ernesto<br>Paolo | Local Coordinator<br>Local Coordinator<br>National Investigator  |
|                        | <b>SAR01 - Cagliari - St. Michele Hospital</b>                           | Mannu<br>Songini                  | Carla<br>Marco                    | Local Coordinator<br>National Investigator                       |
| <b>Luxembourg</b>      | <b>LUX01 - Luxembourg - Centre Hospitalier de Luxembourg</b>             | de Beaufort<br>Schierloh          | Carine<br>Ulrike                  | National Investigator<br>Co-Investigator                         |
| <b>The Netherlands</b> | <b>NET01 - Rotterdam - Sophia Children's Hospital</b>                    | Bruining<br>Bisschoff             | Jan<br>Margriet                   | National Investigator<br>National Coordinator                    |

|               |                                                                                                   |                                            |                                            |                                                               |
|---------------|---------------------------------------------------------------------------------------------------|--------------------------------------------|--------------------------------------------|---------------------------------------------------------------|
| <b>Poland</b> | <b>POL01 - Wroclaw - Medical University of Wroclaw</b>                                            | Basiak<br>Wasikowa                         | Aleksander<br>Renata                       | Co-Investigator<br>National Investigator                      |
|               | <b>POL02 - Krakow - Polish-American Children's Hospital</b>                                       | Ciechanowska                               | Marta                                      | Local Investigator                                            |
|               | <b>POL03 - Katowice - Medical University of Silesia</b>                                           | Deja<br>Jarosz-Chobot                      | Grazyna<br>Przemyslawa                     | Co-Investigator<br>Local Investigator                         |
|               | <b>POL04 - Lodz - Medical University of Lodz</b>                                                  | Szadkowska                                 | Agnieszka                                  | Co-Investigator                                               |
|               | <b>POL05 - Lodz - Polish Mother's Memorial Hospital (I.C.Z.M.P)</b>                               | Cypryk<br>Zawodniak-Szalapska              | Katarzyna<br>Malgorzata                    | Local Investigator<br>Co-Investigator                         |
| <b>Spain</b>  | <b>SPA01 - Hospital Universitario Cruces, BioCruces, UPV/EHU, CIBERDEM, CIBERER Bilbao, Spain</b> | Castano<br>Gonzalez Frutos<br>Oyarzabal    | Luis<br>Teba<br>Mirentxu                   | National Investigator<br>Local Coordinator<br>Co-Investigator |
|               | <b>SPA02 - Madrid - Hospital Clinico San Carlos</b>                                               | Serrano-Ríos<br>Martínez-Larrad<br>Hawkins | Manuel<br>María Teresa<br>Federico Gustavo | National Investigator<br>Local Coordinator<br>Co-Investigator |
|               | <b>SPA03 - Madrid - Hospital Gregorio Marañon</b>                                                 | Rodriguez Arnau                            | Dolores                                    | Co-Investigator                                               |
| <b>Sweden</b> | <b>SWE01 - Linköping - University of Linköping</b>                                                | Ludvigsson<br>Smolinska Konefal            | Johnny<br>Malgorzata                       | National Investigator<br>National Coordinator                 |
|               | <b>SWE02 - Uddevalla - Uddevalla Hospital</b>                                                     | Hanas                                      | Ragnar                                     | Local Investigator                                            |

|                    |                                                                          |                               |                            |                                                                     |
|--------------------|--------------------------------------------------------------------------|-------------------------------|----------------------------|---------------------------------------------------------------------|
|                    | <b>SWE03 - Göteborg - GothenburgThe Queen Silvia Children's Hospital</b> | Lindblad                      | Bengt                      | Local Investigator                                                  |
|                    | <b>SWE05 - Halmstad - Halmstad Hospital</b>                              | Nilsson                       | Nils-Östen                 | Local Investigator                                                  |
|                    | <b>SWE06 - Trollhättan - Trollhättan Hospital</b>                        | Fors                          | Hans                       | Local Investigator                                                  |
|                    | <b>SWE07 - Norrköping - Vrinnevi Hospital</b>                            | Nordwall                      | Maria                      | Local Investigator                                                  |
|                    | <b>SWE08 - Borås - Borås Hospital</b>                                    | Lindh                         | Agne                       | Local Investigator                                                  |
|                    | <b>SWE09 - Karskrona - Karlskrona Hospital</b>                           | Edenwall                      | Hans                       | Local Investigator                                                  |
|                    | <b>SWE10 - Örebro - University Hospital</b>                              | Åman                          | Jan                        | Local Investigator                                                  |
|                    | <b>SWE11 - Jönköping - Ryhovs Hospital</b>                               | Johansson                     | Calle                      | Local Investigator                                                  |
| <b>Switzerland</b> | <b>SWT01 - Zürich - University Children's Hospital</b>                   | Gadient<br>Konrad<br>Schoenle | Margrit<br>Daniel<br>Eugen | Local Coordinator<br>National Investigator<br>National Investigator |
| <b>USA</b>         | <b>USA01 - Pittsburgh - Children's Hospital of Pittsburgh</b>            | Becker                        | Dorothy                    | USA National Investigator<br>/ Pittsburgh Local Investigator        |
|                    |                                                                          | Daftary<br>Klein              | Ashi<br>Mary Beth          | Co-Investigator<br>Pittsburgh<br>Coordinator                        |
|                    |                                                                          | Gilmour                       | Carol                      | Co-Investigator                                                     |
|                    | <b>USA02 - Seattle - VA Puget Sound Health Care</b>                      | Palmer<br>Malone              | Jerry<br>Patty             | Local Investigator<br>Coordinator                                   |

**System and University of Washington**

|                                                         |                                                                 |          |                    |                       |
|---------------------------------------------------------|-----------------------------------------------------------------|----------|--------------------|-----------------------|
| <b>USA03 - St. Louis - Washington University</b>        | Tanner-Blasiar                                                  | Marilyn  | Coordinator        |                       |
|                                                         | White                                                           | Neil     | Local Investigator |                       |
|                                                         | <b>USA04 - Los Angeles - Mattel Children's Hospital of UCLA</b> | Devaskar | Uday               | Local Investigator    |
|                                                         |                                                                 | Horowitz | Heather            | Coordinator/dietitian |
|                                                         |                                                                 | Rogers   | Lisa               | Coordinator/dietitian |
|                                                         | <b>USA05 - Ponce - Ponce School of Medicine</b>                 | Colon    | Roxana             | Coordinator           |
| Frazer                                                  |                                                                 | Teresa   | Co-Investigator    |                       |
| Torres                                                  |                                                                 | Jose     | Local Investigator |                       |
| <b>USA06 - New York - Naomie Berrie Diabetes Center</b> | Goland                                                          | Robin    | Local Investigator |                       |
|                                                         | Greenberg                                                       | Ellen    | Coordinator        |                       |
|                                                         | Schachner                                                       | Holly    | Co-Investigator    |                       |
|                                                         | Softness                                                        | Barney   | Co-Investigator    |                       |

**Laboratories**

|                                                            |            |           |                                        |
|------------------------------------------------------------|------------|-----------|----------------------------------------|
| <b>HLA-typing Laboratory - Turku - Finland</b>             | Ilonen     | Jorma     | Head of HLA-typing Laboratory          |
|                                                            |            |           |                                        |
| <b>HLA-typing Laboratory - Pittsburgh - PA - USA</b>       | Trucco     | Massimo   | Head of HLA-typing Laboratory          |
|                                                            | Nichol     | Lynn      | Chief Technician                       |
| <b>Cow's Milk Antibody Laboratory - Helsinki - Finland</b> | Savilahti  | Erkki     | Head of Cow's Milk Antibody Laboratory |
| <b>Autoantibody Laboratory - Helsinki - Finland</b>        | Härkönen   | Taina     | Co-Investigator                        |
|                                                            | Knip       | Mikael    | Head of Antibody Laboratory            |
| <b>T-Cell Laboratory - Helsinki - Finland</b>              | Vaarala    | Outi      | Head of T-cell Laboratory              |
|                                                            | Luopajarvi | Kristiina | Co-Investigator                        |

**T-Cell Laboratory -  
Toronto - ON - Canada**

Dosch

Hans-Michael

Head of T-Cell Laboratory
